# Supplementary material for: Unraveling the mechanism of enhanced oxygen evolution reaction using NiOx@Fe3O4 decorated on surface-modified carbon nanotubes
Source: Royal Society of Chemistry journal article supplement (doi:10.1039/d4ta02750g), 2024-01-01
Supplement: d4ta02750g1.pdf [file d4ta02750g1.pdf]

## Supplementary Information

### Unraveling the Mechanism of Enhanced Oxygen Evolution Reaction using $\text{NiO}_x@Fe_3O_4$ decorated on surface-modified carbon nanotubes

Minju Kim<sup>1,†</sup>, HyukSu Han<sup>2,†</sup>, Kangpyo Lee<sup>3,†</sup>, Sukhyun Kang<sup>4</sup>, Sang-Hwa Lee<sup>5</sup>, Se Hun Lee<sup>5</sup>, Hayun Jeon<sup>1</sup>, Jeong Ho Ryu<sup>6</sup>, Chan-Yeup Chung<sup>7,\*</sup>, Kang Min Kim<sup>3,\*</sup>, Sungwook Mhin<sup>1,\*</sup>

<sup>1</sup>Department of Advanced Materials Engineering, Kyonggi University, Suwon 16227, Republic of Korea

<sup>2</sup>Department of Energy Science, Sungkyunkwan University, 2066 Seobu-ro, Jangan-gu, Suwon-si, Gyeonggi-do, 16419, Republic of Korea

<sup>3</sup>Korea Institute of Industrial Technology, Gangneung-si, Gangwon 25440, Republic of Korea

<sup>4</sup>LG Display, 245 LG-ro, Paju-si, Gyeonggi-do 10845, Republic of Korea

<sup>5</sup>Advanced Institute of Convergence Technology, Seoul National University, Suwon 16229, Republic of Korea.

<sup>6</sup>Department of Materials Science and Engineering, Korea National University of Transportation, Chungju, Chungbuk 27469, Republic of Korea

<sup>7</sup>Materials Digitalization Center, Korea Institute of Ceramic Engineering & Technology, Jinju 52851, Rep. of Korea

† These authors contributed equally to this work.

\*Correspondence and request for materials should be addressed to C. Chung ([chanyeup@kicet.re.kr](mailto:chanyeup@kicet.re.kr)), K. M. Kim ([kmkim@kitech.re.kr](mailto:kmkim@kitech.re.kr)), and S. Mhin ([swmhin@kgu.ac.kr](mailto:swmhin@kgu.ac.kr))

### SEM image of 1:1\_NiFe

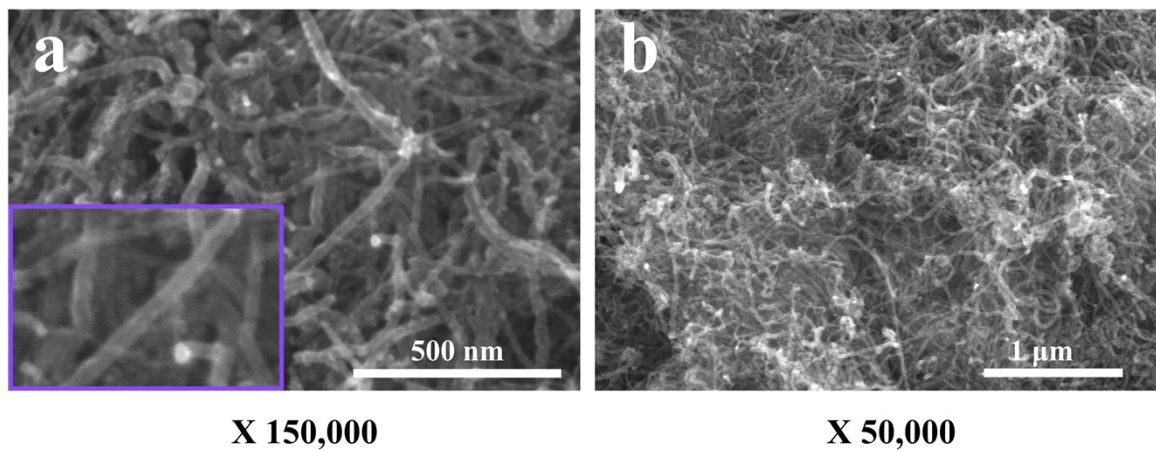

### SEM image of 3:1\_NiFe

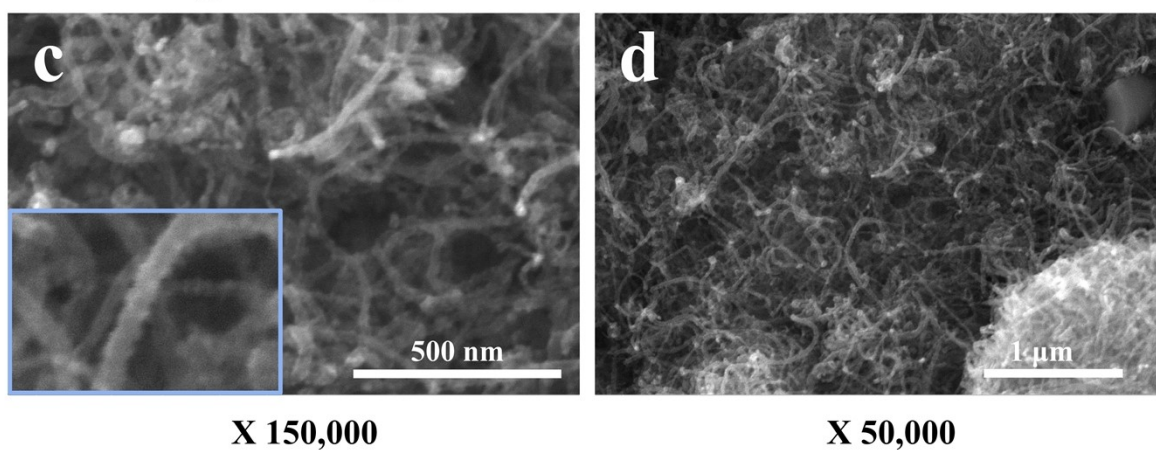

### SEM image of 5:1\_NiFe

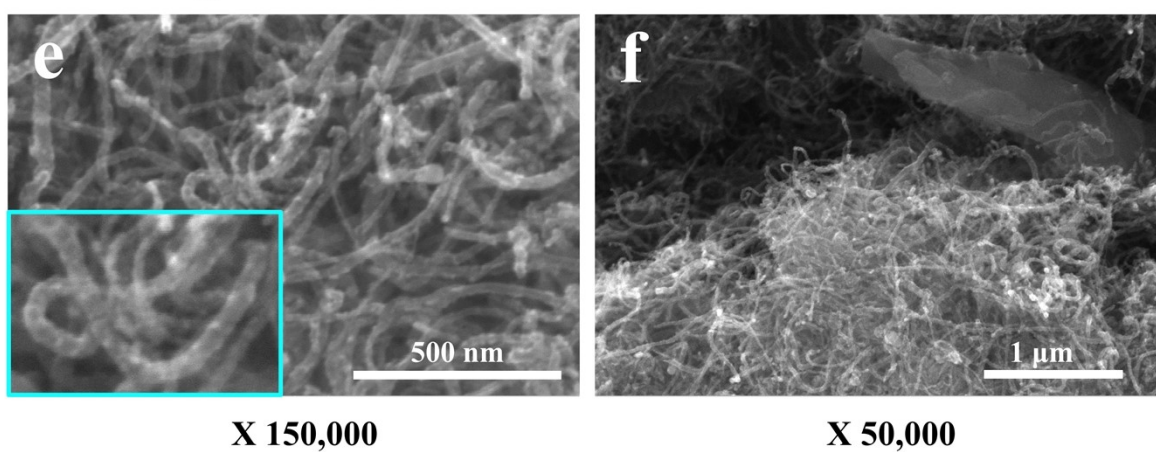

Supplementary Figure 1. SEM images. a, b 1:1\_NiFe c, d 3:1\_NiFe e, f 5:1\_NiFe.

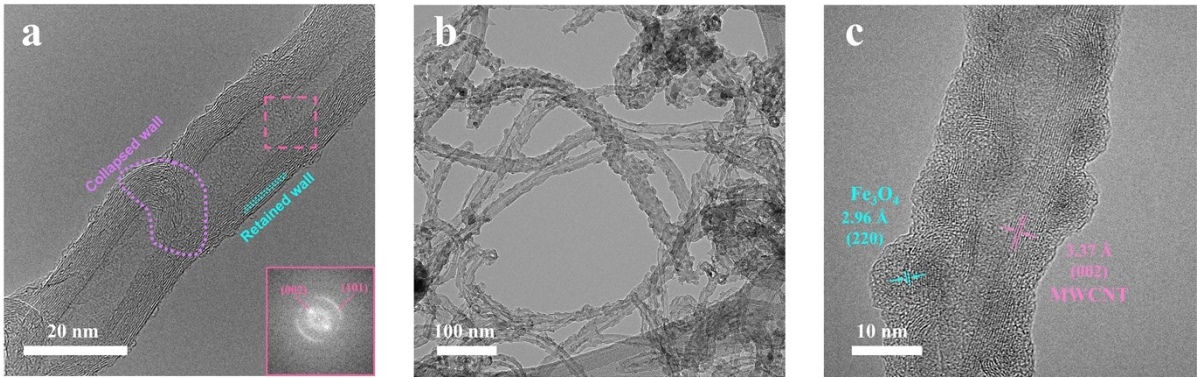

**Supplementary Figure 2.** TEM images. **a** Collapsed and retained wall SMC. **b** Low resolution image of 5:1\_NiFe **c** 1:1\_NiFe.

## XPS spectra of 1:1\_NiFe

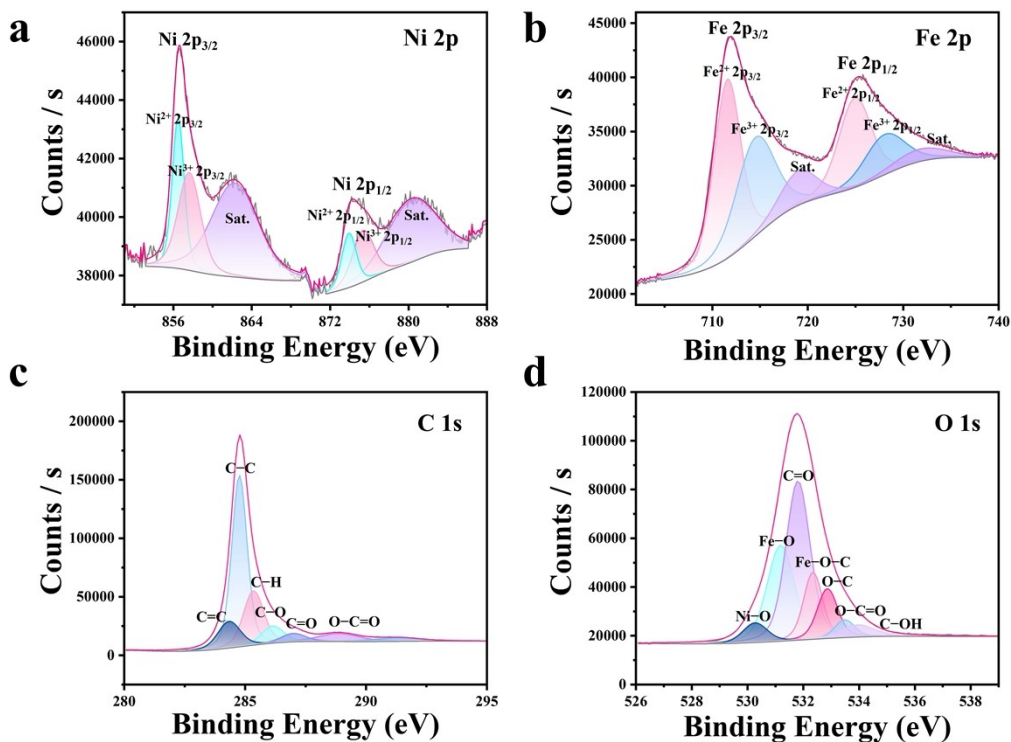

## XPS spectra of Pristine MWCNT

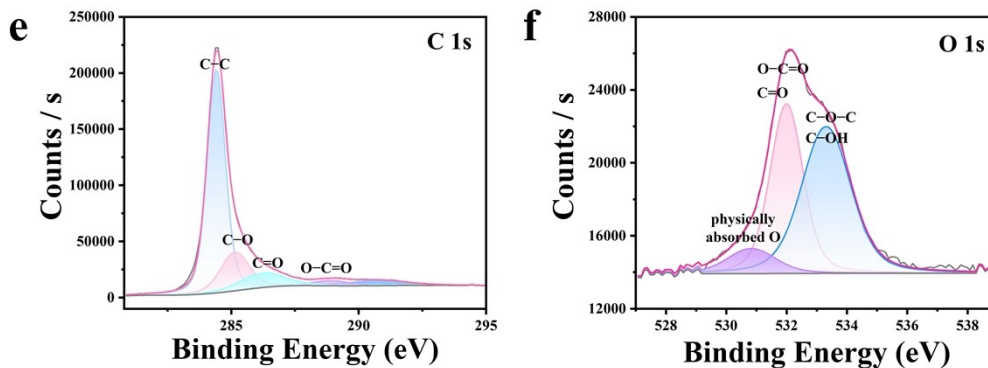

## XPS spectra of SMC

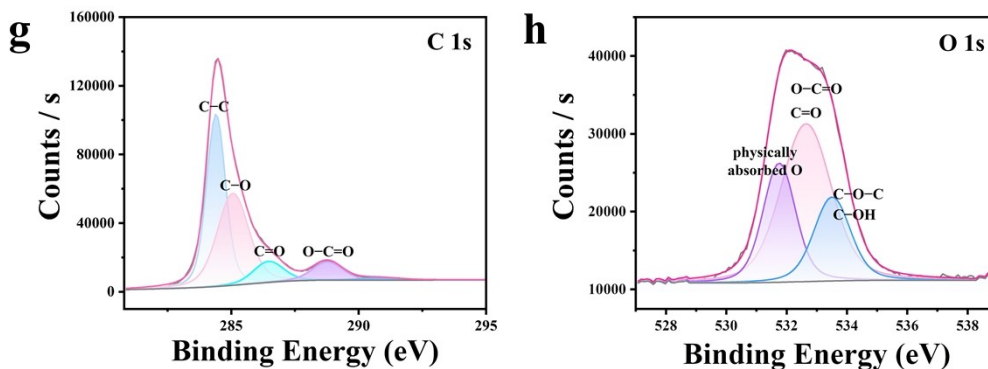

Supplementary Figure 3. XPS spectra of 1:1\_NiFe: **a** Ni 2p, **b** Fe 2p, **c** C 1s, and **d** O 1s. XPS spectra of pristine MWCNT: **e** C 1s and **f** O 1s. XPS spectra of SMC: **g** C 1s and **h** O 1s.

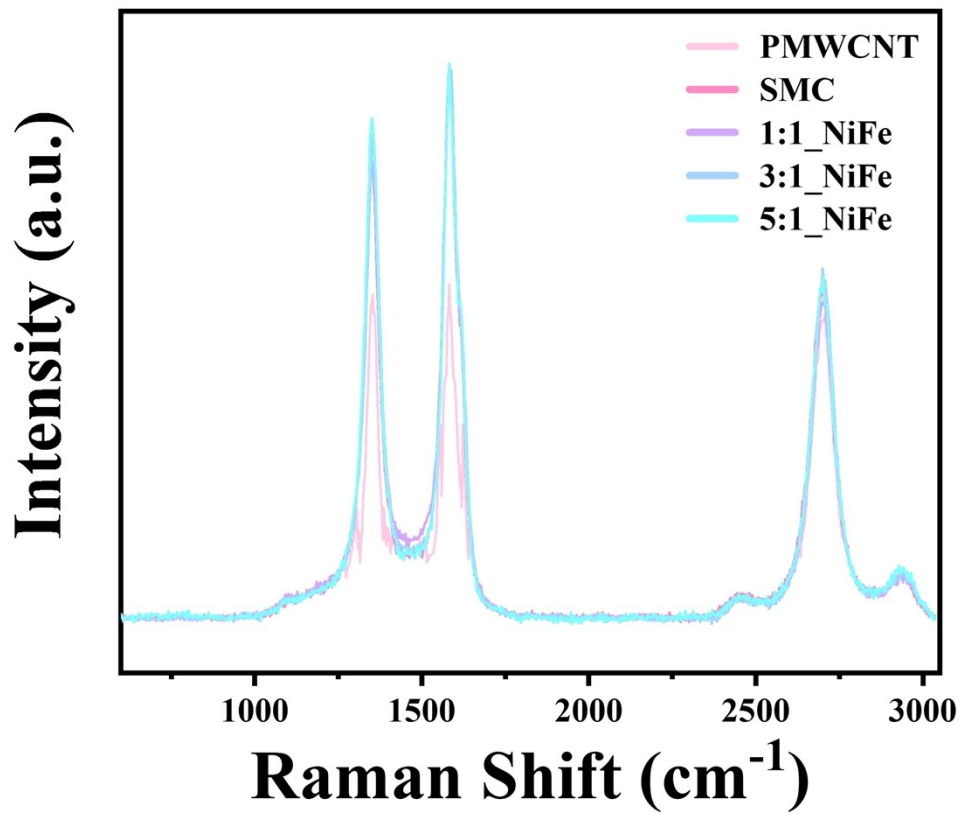

**Supplementary Figure 4.** Raman spectra of PMWCNT, SMC, 1:1\_NiFe, 3:1\_NiFe, and 5:1\_NiFe.

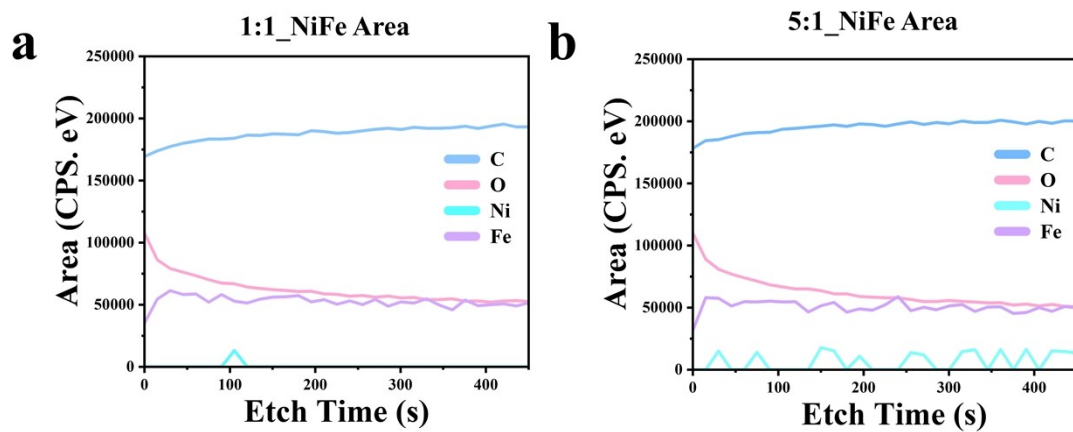

Supplementary Figure 5. Peak area of XPS depth profile: **a** 1:1\_NiFe and **b** 5:1\_NiFe.



**a**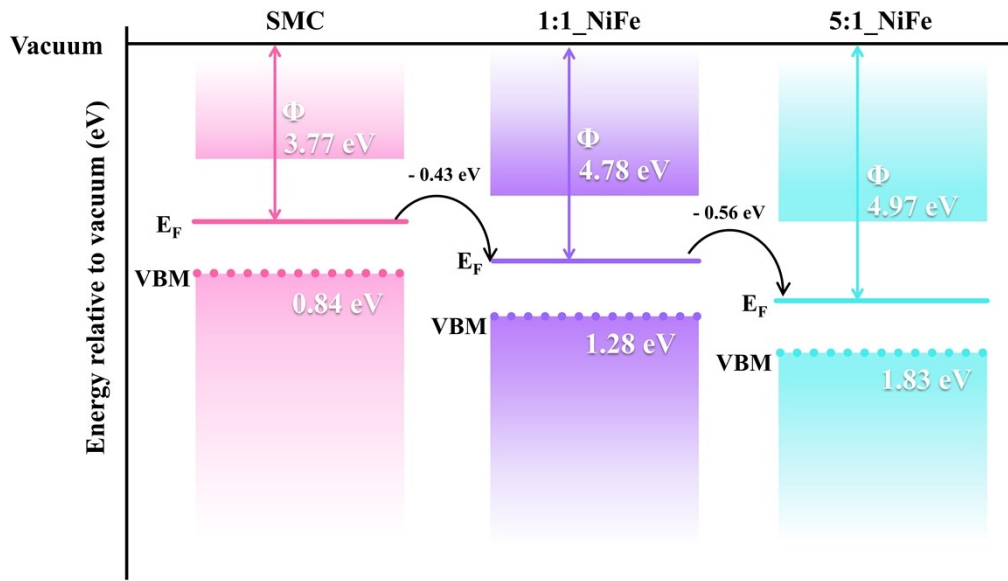**b**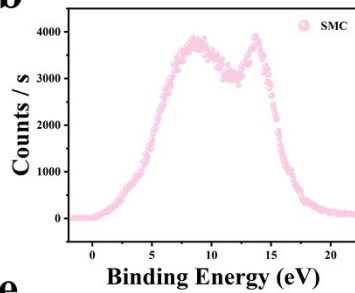**c**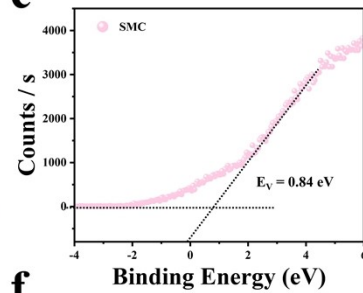**d**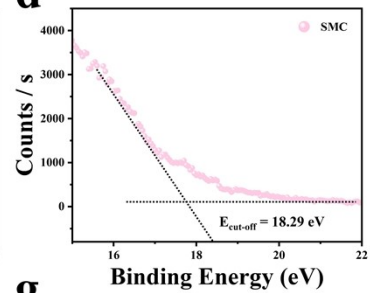**e**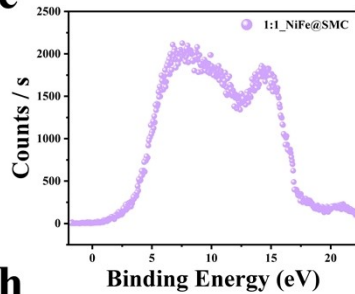**f**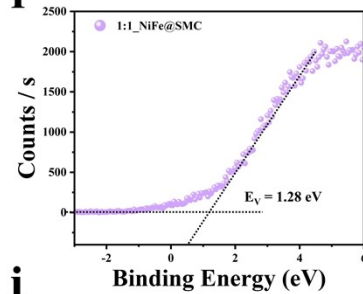**g**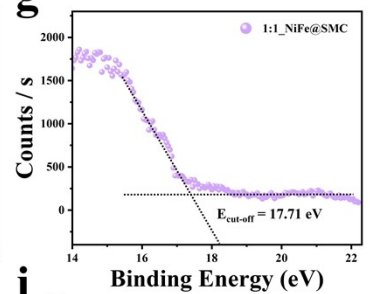**h**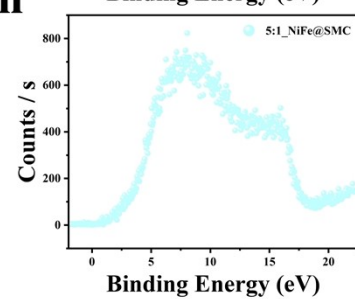**i**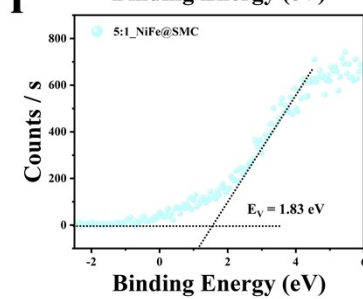**j**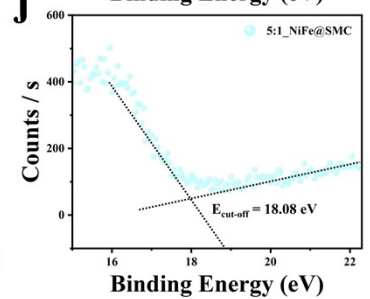

**Supplementary Figure 6.** **a** Schematic illustration of the band structures of SMC, 1:1\_NiFe, and 5:1\_NiFe. UPS spectra of **b** SMC, **e** 1:1\_NiFe, and **h** 5:1\_NiFe. Enlarged UPS spectra for calculating WFs: **c**, **d** SMC, **f**, **g** 1:1\_NiFe, **i**, **j** 5:1\_NiFe.

**TEM image of 5:1\_NiFe after CA test (12 h)**

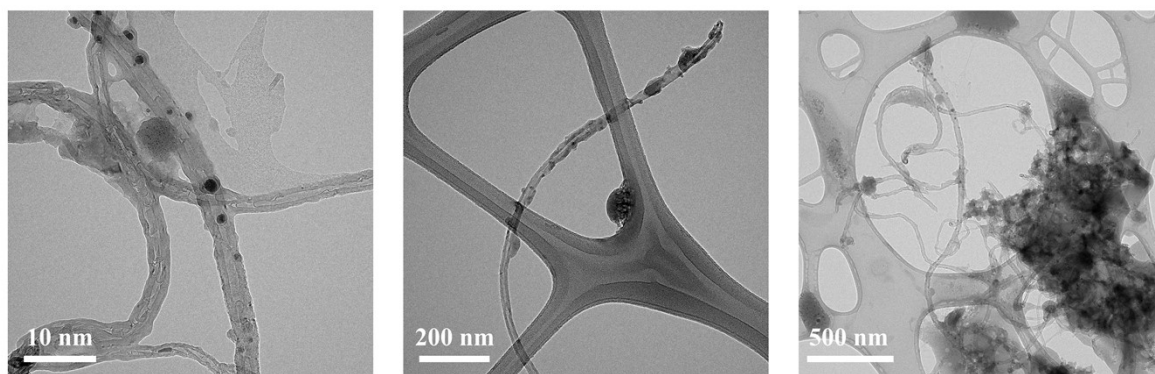

**Supplementary Figure 7.** Low-resolution TEM images of 5:1\_NiFe after CA test (12 h).



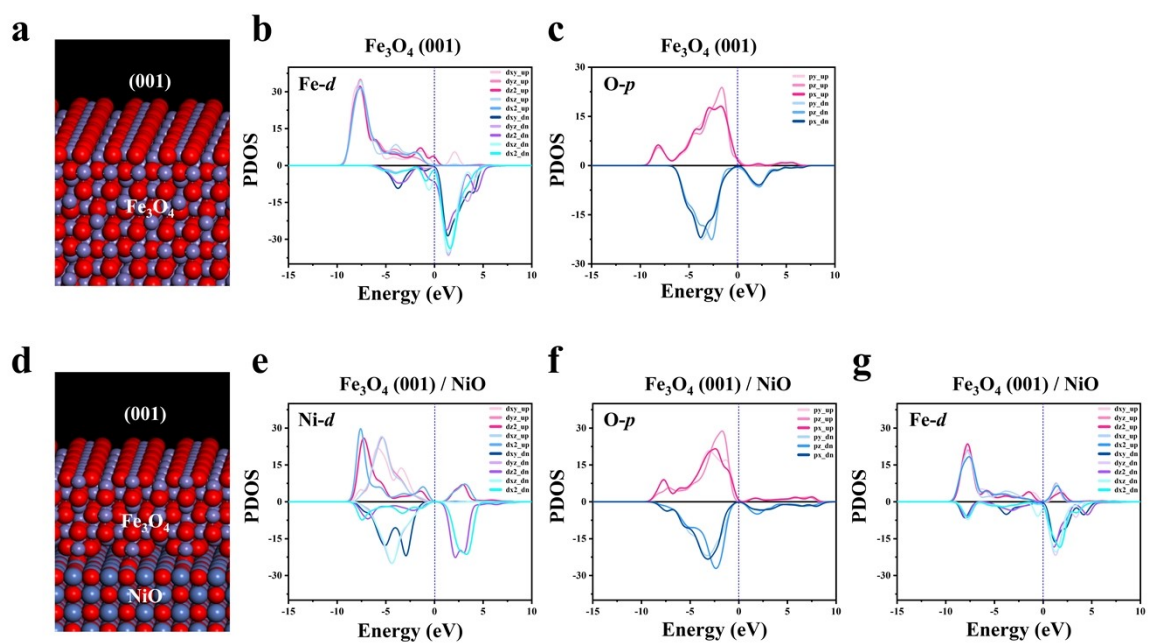

**Supplementary Figure 8.** **a** surface slab model of  $\text{Fe}_3\text{O}_4(001)$  and corresponding PDOS of the **b** Fe-*d*, **c** O-*p* orbital, **d** surface slab model of  $\text{Fe}_3\text{O}_4(001)/\text{NiO}(001)$  and corresponding PDOS of the **e** Ni-*d*, **f** O-*p*, **g** Fe-*d*.

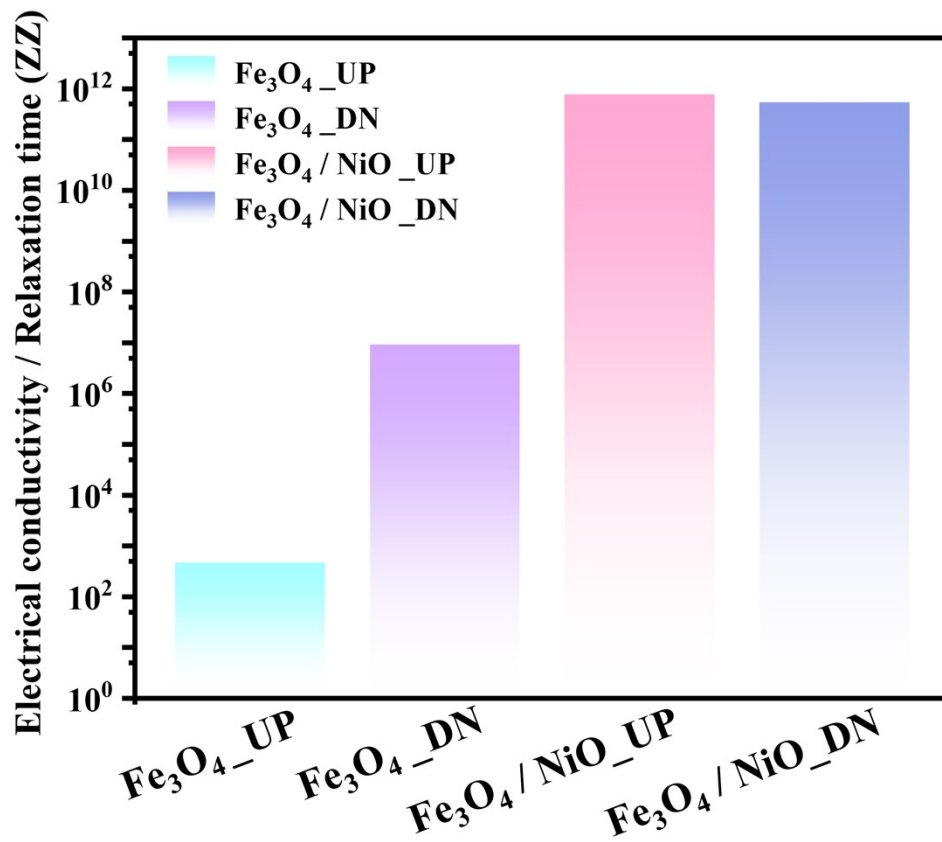

**Supplementary Figure 9.** Calculated electrical conductivity/relaxation time along z axis with up- and down-spin components of Fe-*d* orbital for  $\text{Fe}_3\text{O}_4$  and  $\text{Fe}_3\text{O}_4/\text{NiO}$ .

| XPS spectra of 1:1_NiFe |               |          |          | XPS spectra of 5:1_NiFe |               |          |         |
|-------------------------|---------------|----------|----------|-------------------------|---------------|----------|---------|
| Core level              | Position [eV] | FWHM     | Area     | Core level              | Position [eV] | FWHM     | Area    |
| Ni 2p                   | 856.4869      | 1.45301  | 8968.2   | Ni 2p                   | 856.6089      | 1.62168  | 11642.5 |
|                         | 857.6247      | 2.74222  | 11027.4  |                         | 858.0758      | 1.99213  | 4888.7  |
|                         | 862.2747      | 5.65502  | 21783.3  |                         | 862.3449      | 6.53418  | 25629.2 |
|                         | 873.9263      | 1.76049  | 3917.4   |                         | 874.2601      | 2.11441  | 5580.4  |
|                         | 875.3649      | 2.58965  | 5463.6   |                         | 875.8505      | 2.73322  | 3606.7  |
|                         | 880.3237      | 5.97129  | 15185.5  |                         | 880.3876      | 5.3074   | 12253.9 |
| Fe 2p                   | 711.5805      | 3.32038  | 65799.5  | Fe 2p                   | 711.7844      | 3.30673  | 77283.4 |
|                         | 714.5154      | 4.80872  | 52482.5  |                         | 714.7857      | 4.63599  | 55052.4 |
|                         | 719.0264      | 4.64257  | 17542.1  |                         | 719.15        | 4.88029  | 21970.1 |
|                         | 724.9465      | 4.04612  | 40132    |                         | 725.0329      | 3.93529  | 43600.4 |
|                         | 728.0539      | 4.98635  | 22199.5  |                         | 727.7854      | 4.52997  | 20888.1 |
|                         | 731.7826      | 6.51174  | 8907     |                         | 730.6401      | 7.37617  | 19056.7 |
| O 1s                    | 529.3975      | 1.13729  | 13817.8  | O 1s                    | 529.354       | 1.22782  | 21137.1 |
|                         | 530.2526      | 1.11585  | 54862.3  |                         | 530.1972      | 1.13979  | 88129.8 |
|                         | 530.8492      | 1.03566  | 79947.6  |                         | 530.6792      | 0.965672 | 55327.7 |
|                         | 531.1948      | 0.819101 | 24316.3  |                         | 531.1198      | 0.972646 | 39339.6 |
|                         | 531.5157      | 0.898503 | 20207.8  |                         | 531.5754      | 0.90247  | 18304.9 |
|                         | 532.1509      | 0.880186 | 7014.9   |                         | 532.1459      | 0.890923 | 12089.2 |
| 532.9328                | 1.3943        | 6874.2   | 532.8037 | 0.93061                 | 5305.2        |          |         |
| C 1s                    | 284.3383      | 1.10223  | 29979.8  | C 1s                    | 284.2222      | 0.93716  | 29914.2 |
|                         | 284.7647      | 0.745764 | 131150.4 |                         | 284.7769      | 0.709016 | 147558  |
|                         | 285.348       | 0.993179 | 55216.2  |                         | 285.211       | 0.930601 | 50591   |
|                         | 286.1361      | 1.08299  | 18820.8  |                         | 285.7428      | 1.34262  | 40641   |
|                         | 287.003       | 1.17573  | 9974.2   |                         | 286.8214      | 1.36339  | 15368   |
|                         | 288.8894      | 2.00339  | 15834.3  |                         | 288.9455      | 2.20279  | 17452.5 |
| 291.2894                | 2.16573       | 7715.1   | 291.3123 | 1.91351                 | 7592.1        |          |         |

**Supplementary Table 1.** Quantitative XPS information of 1:1\_NiFe and 5:1\_NiFe.

|                             | <b>Pristine<br/>MWCNT</b> | <b>SMC</b> | <b>1:1_NiFe</b> | <b>3:1_NiFe</b> | <b>5:1_NiFe</b> |
|-----------------------------|---------------------------|------------|-----------------|-----------------|-----------------|
| <b><math>I_D/I_G</math></b> | 0.77                      | 0.81       | 0.82            | 0.87            | 0.90            |

**Supplementary Table 2.** Ratios of the  $I_D/I_G$  band intensity of the different samples.

| Catalysts                                           | Overpotential<br>[mV vs. RHE] | Tafel slope<br>[mV dec <sup>-1</sup> ] | Rct<br>[Ω] | Reference |
|-----------------------------------------------------|-------------------------------|----------------------------------------|------------|-----------|
| 5:1_NiFe                                            | 286                           | 32                                     | 39.33      | This work |
| Co@Co <sub>3</sub> O <sub>4</sub> /NC-1             | 420                           | 91.5                                   | -          | [S1]      |
| LaNiO <sub>3</sub>                                  | 460                           | 96                                     | 63.49      | [S2]      |
| Ni <sub>1</sub> Fe <sub>2</sub> -O                  | 316                           | 47                                     | 25.52      | [S3]      |
| Zn <sub>0.35</sub> Co <sub>0.65</sub> O             | 322                           | 42.6                                   | -          | [S4]      |
| CoNiO <sub>2</sub> -8                               | 269                           | 56.9                                   | -          | [S5]      |
| NiMoO <sub>4</sub> @Co <sub>3</sub> O <sub>4</sub>  | 282                           | 58                                     | 1.1        | [S6]      |
| N, S-CNT                                            | 360                           | 56                                     | -          | [S7]      |
| Co <sub>3</sub> O <sub>4</sub> @MWCNT (vs. Ag/AgCl) | 474                           | 51                                     | 4.2        | [S8]      |
| MnO <sub>2</sub> /carbon fiber paper                | 467                           | 111.7                                  | -          | [S9]      |

**Supplementary Table 3.** The OER activities of recently reported electrocatalysts for overall water splitting.

|                                                 | <b>SMC</b> | <b>1:1_NiFe</b> | <b>5:1_NiFe</b> |
|-------------------------------------------------|------------|-----------------|-----------------|
| <b><math>E_{\text{cut-off}}</math><br/>[eV]</b> | 18.29      | 17.71           | 18.08           |
| <b><math>E_{\text{VBM}}</math><br/>[eV]</b>     | 0.84       | 1.28            | 1.83            |
| <b>Work Function<br/>[<math>\Phi</math>]</b>    | 3.77       | 4.78            | 4.97            |

**Supplementary Table 4.**  $E_{\text{cut-off}}$ ,  $E_{\text{VBM}}$ , and WFs of SMC, 1:1\_NiFe, and 5:1\_NiFe based on UPS data.



| OER energy [eV] | Model | DBT                            |                                     | SCV                            |                                     |
|-----------------|-------|--------------------------------|-------------------------------------|--------------------------------|-------------------------------------|
|                 |       | Fe <sub>3</sub> O <sub>4</sub> | Fe <sub>3</sub> O <sub>4</sub> /NiO | Fe <sub>3</sub> O <sub>4</sub> | Fe <sub>3</sub> O <sub>4</sub> /NiO |
| <b>R 1</b>      |       | 0.779                          | 0.385                               | 1.427                          | 1.233                               |
| <b>R 2</b>      |       | 2.636                          | 1.093                               | 3.303                          | 1.717                               |
| <b>R 3</b>      |       | 0.972                          | 1.949                               | 0.274                          | 0.850                               |
| <b>R 4</b>      |       | 1.135                          | 2.096                               | 0.519                          | 1.723                               |

**Supplementary Table 5.** Calculated energy barriers of the four steps of the OER considering DBT and SCV structures of the Fe<sub>3</sub>O<sub>4</sub>(001) and Fe<sub>3</sub>O<sub>4</sub>(001)/NiO(001).

## References

- [S1] A. Aijaz, J. Masa, C. Rösler, W. Xia, P. Weide, A. J. R. Botz, R. A. Fischer, W. Schuhmann and M. Muhler, *Angew. Chem. Int. Ed.*, 2016, **55**, 4087-4091
- [S2] Y. Sun, R. Li, X. Chen, J. Wu, Y. Xie, X. Wang, K. Ma, Li. Wang, Z. Zhang, Q. Liao, Z. Kang and Y. Zhang, *Adv. Energy Mater.*, 2021, **11**, 2003755
- [S3] C. Dong, T. Kou, H. Gao, Z. Peng and Z. Zhang, *Adv. Energy Mater.* 2018, **8**, 1701347
- [S4] S. Wahl, S. M. El-Refaei, A. G. Buzanich, P. Amsalem, K. S. Lee, N. Koch, M. L. Doublet and N. Pinna, *Adv. Energy Mater.*, 2019, **9**, 1900328
- [S5] Y. Z. Jin, Z. Li, J. Q. Wang, R. Li, Z. Q. Li, H. Liu, J. Mao, C. K. Dong, J. Yang, S. Z. Qiao and X. W. Du, *Adv. Energy Mater.*, 2018, **8**, 1703469
- [S6] G. Solomon, A. Landström, R. Mazzaro, M. Jugovac, P. Moras, E. Cattaruzza, V. Morandi, I. Concina and A. Vomiero, *Adv. Energy Mater.*, 2021, **11**, 2101324
- [S7] K. Qu, Y. Zheng, Y. Jiao, X. Zhang, S. Dai and S. Z. Qiao, *Adv. Energy Mater.*, 2017, **7**, 1602068
- [S8] Y. X. Zhang, X. Guo, X. Zhai, Y. M. Yan and K. N. Sun, *J Mater. Chem. A*, 2015, **3**, 1761-1768
- [S9] Z. Ye, T. Li, G. Ma, Y. Dong and X. Zhou, *Adv. Funct. Mater.*, 2017, **27**, 1704083
